# Supplementary material for: Causes and Consequences of Coronavirus Spike Protein Variability
Source: Preprints.org preprint supplement (doi:10.20944/preprints202401.0230.v1), 2024-01-03
Supplement: Supplementary file 1 [file supplementary]

## Sheet: Sheet1
>SASRS_COV_2_Hu1_BCN86353.1
>SARS_CoV_2_Alpha_BCN86353.1
>SARS_CoV_2_Delta_QTW89558
>SARS_CoV_2_Omicron_BA.1_UFO69279.1
>SARS_CoV_2_Omicron_BA.2_UHU97100
>SARS_CoV_2_Omicron_BA.5_UPN16705
>SARS_CoV_2_Omicron_XBB.1_UXU98303
>SARS_CoV_1_AAR86775.1
>MERS_QBM11748.1
>OC43_AVR40344.1
>HKU-1_YP_173238.1
>NL66_YP_003767.1
>229E_NP_073551.1
>PCoV_GX-P2V_QIQ54048.1
>PCoV_GX-P5E_QIA48632.1
>PCoV_GX-P4L_QIA48614.1
>pCoV-2019_QLR06867.1
>bCoV_RaTG13_QHR63300.2
>bCoV_RpYN06_QWA14169.1
>bCoV_Ra22QT106_WLJ60557.1
>bCoV_RacCS203_QQM18864.1
>bCoV_CoVZC45_AVP78031.1
>bCoV_CoVZXC21_AVP78042.1
>bCoV_BANAL-20-52_UAY13217.1
>bCoV_BANAL-20-103_UAY13229.1
>bCoV_BANAL-20-236_UAY13253.1
>bCoV_BANAL-20-116_UAY13241.1
>bCoV_BANAL-20-247_UAY13265.1
>Civet_CoV_007_AAU04646.1
>Civet_CoV_010_AAU04649.1
>bCoV_WIV16_ALK02457.1
>bCoV_YN2018A_QDF43820.1
>bCoV_YN2016C_QZX47520.1
>bCoV_YN2018C_QDF43830.1
>bCoV_Rs4874_ATO98205.1
>bCoV_Rs3367_AGZ48818.1
>bCoV_Rc-o319_BCG66627.1
>bCoV_Rm1_ABD75332.1
>bCoV_Rf1_ABD75323.1
>bCoV_BtKY72_APO40579.1
>bCoV_BM48-31_YP_003858584.1
